# Supplementary material for: Ivermectin Treatment and Sanitation Effectively Reduce Strongyloides stercoralis Infection Risk in Rural Communities in Cambodia
Source: PubMed Central journal article supplement (PMC4993485; doi:10.1371/journal.pntd.0004909), 2016-08-22
Supplement: pntd.0004909.s002.pdf [file pntd.0004909.s002.pdf]

**S1 Table. Baseline characteristics of participants included in the analysis of *S. stercoralis* infection at baseline and at follow-up**

| Variable                                                   | Category                  | Baseline     | Cohort       |
|------------------------------------------------------------|---------------------------|--------------|--------------|
|                                                            |                           | (N = 3,096)  | (N=1,269)    |
|                                                            |                           | Median; IQR  | Median; IQR  |
| Age (years) <sup>a</sup>                                   |                           | 23 ; 26      | 25; 28       |
| Sex                                                        | Male                      | 1,394 (45.0) | 653 (51.5)   |
|                                                            | Female                    | 1,702 (55.0) | 616 (48.5)   |
| Level of education <sup>b</sup>                            | No schooling              | 449 (14.5)   | 169 (13.3)   |
|                                                            | Primary                   | 1,700 (54.9) | 718 (56.6)   |
|                                                            | Secondary and higher      | 947 (30.6)   | 382 (30.1)   |
| Occupation                                                 | Rice farmer               | 1,564 (50.5) | 690 (54.4)   |
|                                                            | At home                   | 331 (10.7)   | 123 (9.7)    |
|                                                            | School                    | 1,085 (35.0) | 407 (32.1)   |
|                                                            | Tertiary, business, other | 116 (3.8)    | 49 (3.8)     |
| Reported regular place of defecation                       | Toilet                    | 1,326 (42.8) | 539 (42.5)   |
|                                                            | Forest                    | 685 (22.1)   | 306 (24.1)   |
|                                                            | Rice field or water       | 857 (27.7)   | 247 (27.3)   |
|                                                            | Behind house              | 228 (7.4)    | 77 (6.1)     |
| Availability of toilets at home                            | No                        | 1,730 (55.9) | 700 (55.2)   |
|                                                            | Yes                       | 1,366 (44.1) | 569 (44.8)   |
| Wearing shoes, frequency                                   | Always                    | 1,522 (49.2) | 459 (36.2)   |
|                                                            | Often                     | 1,174 (37.9) | 661 (52.1)   |
|                                                            | Sometimes or never        | 400 (12.9)   | 149 (11.7)   |
| Wearing shoes at work or school                            | Yes                       | 2,874 (92.8) | 1,187 (93.5) |
|                                                            | No                        | 222 (7.2)    | 82 (6.5)     |
| Wearing shoes at home                                      | Yes                       | 2,861 (92.4) | 1,170 (92.2) |
|                                                            | No                        | 235 (7.6)    | 99 (7.8)     |
| Wearing shoes when go defecating/to toilets                | Yes                       | 2,748 (88.8) | 1,130 (89.0) |
|                                                            | No                        | 348 (11.2)   | 139 (11.0)   |
| Washing hands after defecating                             | Yes                       | 2,830 (91.4) | 1,160 (91.4) |
|                                                            | No or don't know          | 266 (8.6)    | 109 (8.6)    |
| Washing hands before eating                                | Yes                       | 2,907 (93.9) | 1,195 (94.2) |
|                                                            | No or don't know          | 189 (6.1)    | 74 (5.8)     |
| Use of soap or ashes when washing hands                    | No                        | 1,658 (53.6) | 703 (55.4)   |
|                                                            | Yes                       | 1,438 (46.4) | 566 (44.6)   |
| Do you know anything about worms?                          | No                        | 1,112 (35.9) | 448 (35.3)   |
|                                                            | Yes                       | 1,984 (64.1) | 821 (64.7)   |
| Sources of infection with worms, number of correct answers | 0                         | 1269 (41.0)  | 502 (39.5)   |
|                                                            | < 3                       | 349 (11.3)   | 139 (11.0)   |
|                                                            | 3-5                       | 868 (28.0)   | 357 (28.1)   |
|                                                            | 6-8                       | 610 (19.7)   | 271 (21.4)   |
| Own dog                                                    | Yes                       | 2,461 (79.5) | 1,001 (78.9) |
|                                                            | No                        | 635 (20.5)   | 268 (21.1)   |
| Own farm animals                                           | Yes                       | 2,992 (96.6) | 1,240 (97.7) |
|                                                            | No                        | 104 (3.4)    | 29 (2.3)     |

IQR: interquartile range;

The baseline sample (left column) includes both participants and non-participants in the cohort; the cohort sample includes all cohort participants regardless of whether they were present at one or two follow-up survey(s).

<sup>a</sup> For age, in case of inconsistencies in the age across years, if two of the three values were consistent then the third one was corrected so as to achieve consistency across all three values.

<sup>b</sup> For education attainment, the same procedure as for age was used in case of inconsistencies reported by individuals over 20 years old and not attending school anymore.

Data were obtained from a two-year cohort survey carried out among 3,096 participants at baseline (2012) and 1,269 participants at follow-up (2013 & 2014), in eight villages of Preah Vihear province, Cambodia.
