# Supplementary material for: Ivermectin Treatment and Sanitation Effectively Reduce Strongyloides stercoralis Infection Risk in Rural Communities in Cambodia
Source: PubMed Central journal article supplement (PMC4993485; doi:10.1371/journal.pntd.0004909), 2016-08-22
Supplement: pntd.0004909.s003.pdf [file pntd.0004909.s003.pdf]

**S2 Table. Bivariate associations between explanatory variables submitted for variable selection and *S. stercoralis* infection risk at baseline and at follow-up**

| Variable                                                          | Category                          | Prevalence at baseline |           |             | Incidence at follow-up |             |             |
|-------------------------------------------------------------------|-----------------------------------|------------------------|-----------|-------------|------------------------|-------------|-------------|
|                                                                   |                                   | OR                     | 95%CI     | LRT p-value | OR                     | 95%CI       | LRT p-value |
| Level of education <sup>(a)</sup>                                 | Primary                           | 1.00                   |           | <0.0001     | 1.00                   |             | 0.028       |
|                                                                   | No schooling                      | 0.72                   | 0.57-0.91 |             | 0.55                   | 0.33-0.93   |             |
| Occupation <sup>(a)</sup>                                         | School, at home, other            | 1.00                   |           | <0.0001     | 1.00                   |             | 0.099       |
|                                                                   | Rice farmer                       | 1.53                   | 1.32-1.78 |             | 1.25                   | 0.96-1.62   |             |
|                                                                   | Secondary or higher               | 1.27                   | 1.08-1.50 |             | 1.11                   | 0.83-1.48   |             |
| Socioeconomic level <sup>(b)</sup>                                | Least poor                        | 1.00                   |           | 0.103       | 1.00                   |             | 0.220       |
|                                                                   | Poor                              | 1.08                   | 0.90-1.29 |             | 0.91                   | 0.66-1.25   |             |
|                                                                   | Poorest                           | 1.22                   | 1.02-1.47 |             | 1.2                    | 0.88-1.63   |             |
| Reported regular place of defecation                              | Toilet                            | 1.00                   |           | 0.006       | 1.00                   |             | 0.047       |
|                                                                   | Forest                            | 1.15                   | 0.95-1.40 |             | 1.20                   | 0.86-1.67   |             |
|                                                                   | Rice field or water               | 0.98                   | 0.81-1.17 |             | 1.61                   | 1.15-2.24   |             |
|                                                                   | Behind the house                  | 0.67                   | 0.49-0.93 |             | 1.07                   | 0.60-1.93   |             |
| Availability of toilets at home                                   | No                                | 1.00                   |           | 0.256       | 1.00                   |             | 0.094       |
|                                                                   | Yes                               | 1.09                   | 0.94-1.27 |             | 0.78                   | 0.59-1.04   |             |
| Wearing shoes, frequency                                          | Often                             | 1.00                   |           | < 0.001     | 1.00                   |             | 0.596       |
|                                                                   | Always                            | 1.18                   | 1.01-1.39 |             | 0.78                   | 0.47-1.28   |             |
|                                                                   | Sometimes or never                | 0.72                   | 0.56-0.92 |             | 0.99                   | 0.57-1.71   |             |
| Wearing shoes at work or school                                   | Yes                               | 1.00                   |           | 0.009       | 1.00                   |             | 0.876       |
|                                                                   | No                                | 0.66                   | 0.49-0.91 |             | 1.03                   | 0.68-1.56   |             |
| Wearing shoes at home                                             | Yes                               | 1.00                   |           |             | 1.00                   |             | 0.876       |
|                                                                   | No                                | 0.9                    | 0.68-1.21 | 0.491       | 1.03                   | 0.68-1.56   |             |
| Wearing shoes to go defecating/to toilets                         | Yes                               | 1.00                   |           |             | 1.00                   |             | 0.035       |
|                                                                   | No                                | 0.71                   | 0.55-0.91 | 0.007       | 2.07                   | 1.10-3.91   |             |
| Wearing shoes at home and/or to toilets                           | Any other case                    | n.a.                   | n.a.      | n.a.        | 1.00                   |             | 0.102       |
|                                                                   | No at home, yes to toilets        | n.a.                   | n.a.      | n.a.        | 1.81                   | 0.59-5.49   |             |
|                                                                   | No at home, not to toilets        | n.a.                   | n.a.      | n.a.        | 2.22                   | 1.04-4.76   |             |
| Wearing shoes at work/school and/or to toilets                    | Any other case                    | 1.00                   |           | 0.014       | n.a.                   | n.a.        | n.a.        |
|                                                                   | No at work/school, yes to toilets | 0.91                   | 0.52-1.60 |             | n.a.                   | n.a.        | n.a.        |
|                                                                   | No at work/school, not to toilets | 0.59                   | 0.41-0.85 |             | n.a.                   | n.a.        | n.a.        |
| Washing hands after defecating                                    | Yes                               | 1.00                   |           | 0.500       | 1.00                   |             | 0.040       |
|                                                                   | No                                | 1.10                   | 0.84-1.43 |             | 1.54                   | 1.04-2.28   |             |
| Washing hands before eating                                       | Yes                               | 1.00                   |           | 0.920       | 1.00                   |             | 0.910       |
|                                                                   | No                                | 1.02                   | 0.74-1.39 |             | 0.97                   | 0.54-1.72   |             |
| Use of soap or ashes when washing hands                           | Yes                               | 1.00                   |           | 0.600       | 1.00                   |             | 0.639       |
|                                                                   | No                                | 1.04                   | 0.90-1.21 |             | 1.07                   | 0.81-1.41   |             |
| Do you know anything about worms?                                 | No                                | 1.00                   |           | 0.017       | 1.00                   |             | 0.933       |
|                                                                   | Yes                               | 1.22                   | 1.04-1.43 |             | 1.02                   | 0.70-1.47   |             |
| Sources of infection with worms, number of correct answers        | 0                                 | 1.00                   |           | 0.030       | 1.00                   |             | 0.569       |
|                                                                   | < 3                               | 1.23                   | 0.95-1.58 |             | 1.00                   | 0.60-1.67   |             |
|                                                                   | 3-5                               | 1.22                   | 1.02-1.47 |             | 1.22                   | 0.84-1.79   |             |
|                                                                   | 6-8                               | 1.33                   | 1.08-1.63 |             | 1.02                   | 0.68-1.53   |             |
| Own a dog                                                         | No                                | 1.00                   |           | 0.600       | 1.00                   |             | 0.269       |
|                                                                   | Yes                               | 0.95                   | 0.79-1.14 |             | 1.20                   | 0.86-1.67   |             |
| Own farm animals                                                  | Yes                               | 1.00                   |           | 0.340       | 1.00                   |             | 0.988       |
|                                                                   | No                                | 0.81                   | 0.53-1.25 |             | 0.99                   | 0.39-2.56   |             |
| Infected at baseline                                              | No                                | n.a.                   | n.a.      | n.a.        | 1.00                   |             | 0.124       |
|                                                                   | Yes                               | n.a.                   | n.a.      | n.a.        | 1.25                   | 0.94-1.67   |             |
| Number of family members at baseline                              | -                                 | 1.00                   | 0.96-1.04 | 0.940       | 1.03                   | 0.97-1.10   | 0.372       |
| Proportion of houses with latrines in the village at baseline (%) | -                                 | 1.00                   | 1.00-1.01 | 0.270       | 0.99                   | 0.980-0.996 | 0.045       |
| Village prevalence at baseline                                    | -                                 | n.a.                   | n.a.      | n.a.        | 0.95                   | 0.88-1.03   | 0.269       |

OR: odds ratio; CI: confidence interval; LRT: likelihood ratio test;

<sup>a</sup>: For infection risk at follow-up, the values are that of the previous year, i.e. 2012 for the first follow-up and 2013 for the second follow-up.

<sup>b</sup>: For infection risk at follow-up, the baseline values of socioeconomic level were used.

Data were obtained from a two-year cohort survey carried out among 3,096 participants at baseline (2012) and 1,269 participants at follow-up (2013 & 2014), in eight villages of Preah Vihear province, Cambodia.
