# Supplementary material for: Ivermectin Treatment and Sanitation Effectively Reduce Strongyloides stercoralis Infection Risk in Rural Communities in Cambodia
Source: PubMed Central journal article supplement (PMC4993485; doi:10.1371/journal.pntd.0004909), 2016-08-22
Supplement: pntd.0004909.s004.pdf [file pntd.0004909.s004.pdf]

**S3 Table. Incidence rate ratios for risk factors of *S. stercoralis* infection risk at follow-up.**

| Variable                                              | Category                   | IRR         | 95% CI      | p-value |
|-------------------------------------------------------|----------------------------|-------------|-------------|---------|
| Sex                                                   | Male                       | 1.00        | -           |         |
|                                                       | Female                     | 0.82        | 0.65-1.04   | 0.120   |
| Age (years)                                           | Linear term                | 0.99        | 0.98-1.00   | 0.115   |
| Level of education                                    | Primary                    | 1.00        | -           |         |
|                                                       | No schooling               | <b>0.52</b> | 0.31-0.86   | 0.016   |
|                                                       | Secondary or higher        | 1.13        | 0.88-1.45   | 0.372   |
| Occupation                                            | School, at home, other     | 1.00        | -           |         |
|                                                       | Rice farmer                | <b>1.50</b> | 1.09-2.06   | 0.021   |
| Reported regular place of defecation                  | Toilet                     | 1.00        | -           |         |
|                                                       | Forest                     | 1.10        | 0.80-1.50   | 0.569   |
|                                                       | Rice field or water        | <b>1.43</b> | 1.07-1.91   | 0.024   |
|                                                       | Behind the house           | 1.10        | 0.62-1.96   | 0.741   |
| Wearing shoes at home and/or to toilets               | Any other case             | 1.00        | -           |         |
|                                                       | No at home, yes to toilets | 1.88        | 0.73-4.80   | 0.217   |
|                                                       | No at home, no to toilets  | <b>2.59</b> | 1.30-5.17   | 0.010   |
| Washing hands after defecating                        | Yes                        | 1.00        | -           |         |
|                                                       | No                         | 1.33        | 0.95-1.87   | 0.126   |
| Positive for <i>S. stercoralis</i> at baseline        | No                         | 1.00        | -           |         |
|                                                       | Yes                        | 1.14        | 0.89-1.48   | 0.338   |
|                                                       |                            | 1.00        | -           |         |
| Proportion of houses with latrines in the village (%) |                            | <b>0.99</b> | 0.980-0.997 | 0.006   |

IRR: incidence rate ratio; CI: confidence interval; IRR in bold are significant at 5% level.

As Poisson regression provides biased standard errors when being applied to binary data, confidence intervals were computed using Miettinen's formula  $IRR^{(1 \pm 1.96/t)}$  where t is the valid t-value of the respective parameter estimate in the corresponding mixed logistic regression model.
