# Supplementary material for: Ivermectin Treatment and Sanitation Effectively Reduce Strongyloides stercoralis Infection Risk in Rural Communities in Cambodia
Source: PubMed Central journal article supplement (PMC4993485; doi:10.1371/journal.pntd.0004909), 2016-08-22
Supplement: pntd.0004909.s005.pdf [file pntd.0004909.s005.pdf]

**S4 Table. Results of the multivariate model for *S. stercoralis* infection risk at follow-up, excluding the village with 4% sanitation coverage.**

| Variable                                              | Category                   | OR           | 95% CI      | p-value |
|-------------------------------------------------------|----------------------------|--------------|-------------|---------|
| Sex                                                   | Male                       |              |             |         |
|                                                       | Female                     | 0.79         | 0.59-1.05   | 0.100   |
| Age (years)                                           | Linear term                | 0.99         | 0.98-1.01   | 0.280   |
| Level of education                                    | Primary                    | 1.00         |             |         |
|                                                       | No schooling               | <b>0.45</b>  | 0.23-0.85   | 0.015   |
|                                                       | Secondary or higher        | 1.10         | 0.81-1.50   | 0.549   |
| Occupation                                            | School at home, other      | 1.00         |             |         |
|                                                       | Rice farmer                | <b>1.51</b>  | 1.02-2.24   | 0.038   |
| Reported usual place of defecation                    | Toilet                     | 1.00         |             |         |
|                                                       | Forest                     | 1.05         | 0.74-1.50   | 0.782   |
|                                                       | Rice field or water        | <b>1.51</b>  | 1.05-2.16   | 0.025   |
|                                                       | Behind the house           | 1.00         | 0.48-2.06   | 0.995   |
| Wearing shoes at home and/or to toilets               | Any other case             | 1.00         |             |         |
|                                                       | No at home, yes to toilets | 2.58         | 0.82-8.13   | 0.107   |
|                                                       | No at home, not to toilets | <b>2.61</b>  | 0.98-6.94   | 0.054   |
| Washing hands after defecating                        | Yes                        | 1.00         |             |         |
|                                                       | No                         | <b>1.58</b>  | 1.01-2.47   | 0.044   |
| Positive for <i>S. stercoralis</i> at baseline        | No                         | 1.00         |             |         |
|                                                       | Yes                        | 1.13         | 0.82-1.56   | 0.457   |
| Proportion of houses with latrines in the village (%) |                            | <b>0.990</b> | 0.980-0.999 | 0.033   |

OR: odds ratio; CI: confidence interval; OR in bold are significant at 5% level.

Data were obtained from a two-year cohort survey carried out among 1,128 participants at follow-up (2013 & 2014), in seven villages of Preah Vihear province, Cambodia.
